# Supplementary material for: Redox-regulated dynamic interplay between Cox19 and the copper-binding protein Cox11 in the intermembrane space of mitochondria facilitates biogenesis of cytochrome c oxidase
Source: PubMed Central journal article supplement — Mol Biol Cell. 2015 Jul 1;26(13):2385–401. doi: 10.1091/mbc.E14-11-1526 (PMC4571295; doi:10.1091/mbc.e14-11-1526), 2015-07-01
Supplement: supp_E14-11-1526v1_CombinedSupMats.pdf [file supp_E14-11-1526v1_CombinedSupMats.pdf]

# Supplemental Materials

*Molecular Biology of the Cell*

Bode et al.

| Gene Name | Systematic Name | Molecular Weight [kDa] | Sequence Coverage [%] | PEP       | Both Experiments |                 |           |                      | Experiment A |                 |           |                      | Experiment B |                 |           |                      |
|-----------|-----------------|------------------------|-----------------------|-----------|------------------|-----------------|-----------|----------------------|--------------|-----------------|-----------|----------------------|--------------|-----------------|-----------|----------------------|
|           |                 |                        |                       |           | Peptides         | Unique Peptides | Ratio L/H | Ratio L/H Normalized | Peptides     | Unique Peptides | Ratio L/H | Ratio L/H Normalized | Peptides     | Unique Peptides | Ratio L/H | Ratio L/H Normalized |
| COX19     | YLL018C-A       | 11.105                 | 33.7                  | 3.42E-09  | 3                | 3               | 35.42     | 20.17                | 2            | 2               | 36.08     | 20.72                | 2            | 2               | 19.84     | 14.39                |
| COX11     | YPL132W         | 34.044                 | 18                    | 1.06E-135 | 5                | 5               | 17.08     | 10.81                | 4            | 4               | 17.05     | 10.77                | 3            | 3               | 21.00     | 14.66                |
| TEF2      | YBR118W         | 50.032                 | 2.4                   | 5.59E-02  | 1                | 1               | 3.48      | 2.44                 | 1            | 1               | 6.07      | 3.77                 | 1            | 1               | 1.97      | 1.54                 |
| MCR1      | YKL150W         | 34.137                 | 57.3                  | 9.12E-256 | 14               | 14              | 2.76      | 1.78                 | 13           | 13              | 4.93      | 3.11                 | 12           | 12              | 1.61      | 1.24                 |
| AIM9      | YER080W         | 72.413                 | 2.2                   | 8.90E-11  | 1                | 1               | 3.00      | 1.77                 | 1            | 1               | 2.67      | 1.57                 | 1            | 1               | 16.49     | 11.78                |
| IDP1      | YDL066W         | 48.19                  | 28.3                  | 2.74E-98  | 9                | 7               | 2.59      | 1.76                 | 8            | 6               | 3.65      | 2.16                 | 9            | 7               | 1.75      | 1.28                 |
| RPL23A    | YBL087C         | 14.473                 | 5.8                   | 1.78E-01  | 1                | 1               | 2.50      | 1.74                 | 0            | 0               | not found | not found            | 1            | 1               | 2.50      | 1.74                 |
| BBC1      | YJL020C         | 128.29                 | 16.9                  | 0.00E+00  | 17               | 17              | 2.68      | 1.71                 | 14           | 14              | 2.90      | 1.82                 | 13           | 13              | 1.76      | 1.34                 |
| CCP1      | YKR066C         | 40.352                 | 21.9                  | 3.29E-30  | 6                | 6               | 2.78      | 1.71                 | 6            | 6               | 2.86      | 1.75                 | 1            | 1               | 1.72      | 1.29                 |
| MYO3      | YKL129C         | 142.45                 | 2.2                   | 1.41E-23  | 2                | 2               | 2.57      | 1.54                 | 2            | 2               | 2.76      | 1.65                 | 2            | 2               | 1.36      | 1.00                 |
| NPR1      | YNL183C         | 85.989                 | 3.7                   | 6.96E-02  | 2                | 2               | 2.60      | 1.53                 | 2            | 2               | 2.60      | 1.53                 | 0            | 0               | not found | not found            |
| FSF1      | YOR271C         | 35.414                 | 9.8                   | 3.46E-02  | 2                | 2               | 2.61      | 1.50                 | 2            | 2               | 2.61      | 1.50                 | 0            | 0               | not found | not found            |
| YMR31     | YFR049W         | 13.689                 | 7.3                   | 8.07E-01  | 1                | 1               | 2.07      | 1.49                 | 0            | 0               | not found | not found            | 1            | 1               | 2.07      | 1.49                 |
| SPG1      | YGR236C         | 10.545                 | 13.7                  | 9.41E-06  | 1                | 1               | 2.58      | 1.49                 | 1            | 1               | 2.65      | 1.55                 | 1            | 1               | 1.31      | 0.96                 |
| PRX1      | YBL064C         | 29.495                 | 50.2                  | 1.73E-253 | 10               | 10              | 1.95      | 1.48                 | 8            | 8               | 2.20      | 1.40                 | 9            | 9               | 1.83      | 1.50                 |
| HSP10     | YOR020C         | 11.372                 | 10.4                  | 1.73E-20  | 1                | 1               | 1.88      | 1.47                 | 0            | 0               | not found | not found            | 1            | 1               | 1.88      | 1.47                 |
| ACO1      | YLR304C         | 85.367                 | 33.9                  | 6.10E-154 | 19               | 19              | 1.89      | 1.43                 | 10           | 10              | 2.03      | 1.25                 | 19           | 19              | 1.84      | 1.47                 |
| MRM1      | YOR201C         | 46.387                 | 10.9                  | 9.29E-18  | 2                | 2               | 2.42      | 1.42                 | 2            | 2               | 2.42      | 1.42                 | 0            | 0               | not found | not found            |
| RPL32     | YBL092W         | 14.771                 | 23.8                  | 6.81E-22  | 4                | 4               | 2.09      | 1.42                 | 4            | 4               | 2.43      | 1.51                 | 3            | 3               | 1.55      | 1.27                 |
| TIM17     | YJL143W         | 16.584                 | 15.2                  | 8.78E-04  | 1                | 1               | 2.12      | 1.38                 | 1            | 1               | 2.12      | 1.38                 | 0            | 0               | not found | not found            |
| QCR10     | YHR001W-A       | 8.5928                 | 26                    | 7.91E-15  | 2                | 2               | 1.88      | 1.38                 | 2            | 2               | 1.84      | 1.16                 | 2            | 2               | 1.95      | 1.57                 |
| MMF1      | YIL051C         | 15.908                 | 6.2                   | 8.60E-07  | 1                | 1               | 1.99      | 1.38                 | 1            | 1               | 1.95      | 1.12                 | 1            | 1               | 2.11      | 1.75                 |
| YHM2      | YMR241W         | 34.184                 | 32.5                  | 2.58E-301 | 8                | 8               | 2.19      | 1.38                 | 8            | 8               | 2.28      | 1.41                 | 5            | 5               | 1.51      | 1.16                 |
| CDC42     | YLR229C         | 21.322                 | 9.4                   | 2.64E-09  | 2                | 2               | 2.02      | 1.36                 | 1            | 1               | 2.02      | 1.23                 | 2            | 2               | 2.01      | 1.44                 |
| PDA1      | YER178W         | 46.343                 | 2.6                   | 6.38E-19  | 1                | 1               | 1.80      | 1.36                 | 0            | 0               | not found | not found            | 1            | 1               | 1.80      | 1.36                 |
| TDH1      | YJL052W         | 35.75                  | 61.4                  | 0.00E+00  | 19               | 14              | 1.87      | 1.36                 | 18           | 13              | 1.96      | 1.22                 | 16           | 11              | 1.82      | 1.49                 |
| DIC1      | YLR348C         | 32.991                 | 5.7                   | 3.06E-03  | 1                | 1               | 2.37      | 1.35                 | 1            | 1               | 2.37      | 1.35                 | 0            | 0               | not found | not found            |
| GLO4      | YOR040W         | 32.338                 | 7.4                   | 7.81E-02  | 1                | 1               | 2.15      | 1.35                 | 1            | 1               | 2.15      | 1.35                 | 0            | 0               | not found | not found            |
| MDH1      | YKL085W         | 35.65                  | 56.3                  | 1.31E-246 | 12               | 12              | 1.68      | 1.35                 | 4            | 4               | 1.25      | 0.74                 | 12           | 12              | 1.75      | 1.36                 |
| SEC1      | YDR164C         | 83.479                 | 2.2                   | 1.08E-19  | 1                | 1               | 2.19      | 1.33                 | 1            | 1               | 2.19      | 1.33                 | 0            | 0               | not found | not found            |

*Scer* MSGNPGSSLSALRPTPP**PERGSFPLDHDGEC**TKYMQEY**YLC**MQLVQENAM 50  
*Klac* MSANPGNSLKALSPTPP**PERGSFPLDHDGD**CTKMQEY**YLS**ICKLVKGENAP 50  
*Calb* MLFSFFIGGNFRTWTPTPP**PERGSFPLDHDGEC**KEYMTKY**YLC**MKFTENKNAP 52  
*Anid* MSFGSPGGGATNVKPTPP**PERGSFPLDHDGEC**KHLIQSY**YLR**CLKLQRGVNDE 51  
*Anig* MGFGAPGGGAVPVKPTPP**PERGSFPLDHDGEC**KHLITDY**YLC**CLKSRRGVNDD 51  
*Bcin* MSTFGSPGGRMVNNKPSPP**PERGSFPLDHDGEC**KSVMQSY**YLS**CMKKVVRGMNDP 52  
*Atha* MITIKFDLNRYRSRWSGAGGAFGGNRGLRPI**PEKGI**FPLDHL**HEC**DAEKKEY**YLC**CLKSSAHKSE- 64  
*Pvul* MSAAGGAFGGNRGLRPV**PEKGI**FPLD**HMLC**DLEKAE**YLN**CLKTAGHQSE- 51  
*Dmel* MTSQIYSQKKFVPT**PEKGS**FPLD**HEGL**CKKQ**FLLYAS**CLRKNAQDTS- 48  
*Btau* MSTAMNFGSKSFQPR**PPDKGS**FPLD**HFGEC**CKSFKE**KFMK**CLRDNNFENA- 49  
*Hsap* MSTAMNFGTKSFQPR**PPDKGS**FPLD**HLGEC**CKSFKE**KFMK**CLHNNNFENA- 49  
  
*HsMia40* 41 GLILPNGN**INWNC**PC**CLGGMA**SG**PC**GE**QFKSAF****SCRF**HYSTEEIKG 84  
*ScMia40* 284 AYNPDTGE**INWDC**PC**CLGGMA**H**GPC**GE**EFKSAF****SCRF**VYSEAE**PKG** 327

*Scer* **NC**RLLAKDY**LR****CR**MDHQLMDYDEWSHL**GL**LPEDAPGNNGKTIKD**ATDNK** 98  
*Klac* **NC**RLLAKE**YLR****CR**MDNK**LMDR**DDWKHL**GL**PSDKKEANDVTKET**TP**TS**GQ** 99  
*Calb* **NC**RILAK**QYLR****CR**MDNQLMEKSDWDSL**GL**VNLPGENDVELDHHHHLNNNN**TKADGKSG**... 133  
*Anid* **Q****CR**RLLAK**GYL****AC**RM**DKNL**MAPDDFR**NLGL**LVFENDGDGSHAQAQA**QTQVQTQSGSSS**G 108  
*Anig* **E****CR**KLAK**SYL****SC**RM**DHNL**MAPDD**FKNLGL**LIFEKDKATPSGGAE**GAEKKE** 100  
*Bcin* **E****CR**DLAK**SYL****SC**RM**DRNL**MAKDEF**KNLGF**ADESSE**TKGADK**KDVKEGGNDANK**HKNELRW** 112  
*Atha* **Q****CR**HLSK**KYL****Q**CR**MAKNL**MAKQDMA**ELGF**SGVKELD**STEDKN**TESIEH 112  
*Pvul* **K****CR**QFSK**KYL****Q**CR**MERNL**MAKQDLA**ELGF**KESNVET**PGGKITDR**VND**QDQ** 101  
*Dmel* **Q****CR**QDAQ**NYL****AC**RM**DNNL**MEKTEWS**KLGF**HDQ**STKTDQ**KEPEV**QKQ** 94  
*Btau* **L****CR**NESK**EYLR****CR**MR**QLMA**QE**PLEKLG**FGDLIDGKSD**KN** 89  
*Hsap* **L****CR**KESK**EYLR****CR**MR**KLML**QE**PLEKLG**FGDLTSGKSE**AKK** 90

*HsMia40* **SD****C**VD**QFR**AM**QEC**M**Q**KY**PDLY**Q**EDEDE**EEER**EKKPAE**Q**AE**ET**APIE**ATAT**KEEEGSS** 142  
*ScMia40* **ID****C**VE**KFQ**HM**QDC**F**R**KY**PEHY**A**EQLK**ETS**DDEE**P**QDKV**KVNT**IESAP**NVSSAK**ENAAKKA**... 403

Matrix/Cytosolic Domain Transmembrane Domain

*S. cerevisiae* -----MIRICPIVRSKVPLLGLTFLRSDSWLAPHALALRRAICKNVALRSYSVNSEQPKHTFDISKLTRNEIQQLRELKRARERKFKDRTVAFYFSSVAVFLGLAYAA 103  
*K. lactis* XP\_45373.1 -----MLKFFLRAALPASGIRTTINRTRFYRTTRILLRNNGTGNKFDLSKLTREEIKEIRDYKISAARRYKDRTVAFYFTTSIAVFLGLAYAA 88  
*C. albicans* XP\_711523.1. -----MNRLRIYTPIFRSTIVKPAVFRPYAFIVSRGIHTTGKLFQMQHQQQPSVDPDQSSIEKQREWVDRLARERERQKYRNRTAFTYATSLGIFFLALAFSA 98  
*A. niger* EHA22857.1 -----MFSRPISSWGRLPWSGPGRLPSTMTNTRCVDSGRRFFTRSSRYAAASLILGTVALAYGS 59  
*A. nidulans* CBF69758.1 -----MFSRLTPPWGWSLSPGAGAARSVLSQAKGLAPGRRYFSRNSWLNQSPSAPFNTPQSQRKNASTMYTITISILGTVSLAYGS 81  
*B. cinerea* XP\_001545817.1 -----MNSIPRISRALSSKNANWICTSCAKAKRTNTPFFKPSINRSISNNSTPRGNVAPTEQLRAPFSQKNSSTMYTITISILGTVAFVSYGS 88  
*P. vulgaris* XP\_007163355.1 WSRLSRTHLLPYVRAMQANSLESRFINPNTSFQHNFSYNIRVSKFNKESFYLSYRSSAFATQNVGKSSSMPGFRHFSSHASKEQKSQKMLLYLTGLVFMVGTYYAA 110  
*A. thaliana* AAG00893.1 -----MLDSAHRQYSTHSPSETKSQKMLLYLTAVVFGMVGLTYAA 40  
*H. sapiens* NP\_004366.1 MGGLWRPGWRCVPCGWRWIHPGSPTRAERVEPFLRPEWSGTGAERGLRWLGTWKRCSLRARHPALQPPRRPKSSNPFTRAQEEERRRQNKTTLYTVAAVAVGMLGASYAA 113  
*H. taurus* DAA19212.1 MGGLWCPAWRRVVFCGWSWSHLGRPTRAERAEPCLRPGRSGPAGTEQGLRRLGTWRRPS-----PAEQPARRPKSTNYPYTRSQEEDWRRRNKTVLTYMAAAVAVGMLGASYAA 108  
*D. melanogaster* NP\_723086.1 -----MMRSLCALRGQCQLFRSSIRPQNSVHSQQFWRMKSTSDPEDAARKLRAKSTLYYITAGGVLVGLSYAA 71  
*C. elegans* NP\_502547.2 -----MSLSRLWGPARSYCFATKSPPLATLSSLQRNSNVI SFQIARGFSSKPNRVVDKADTRNYTYVMSLVIVAI GCTFAA 79  
*Rickettsia prowazekii* WP\_014411674.1 -----MSKKSNNKLAFLSLGLMMSMVLVLSFAS 27  
*Brucella ovis* YP\_001258489.1 -----MTDQGENEKKQRRSNATIAVACL SFFVCMIGAAYAS 36  
*Paracoccus spec.* WP\_010392505.1 -----MSGQEKRSNGRTVAILLGVAVLMGALSWA 30

Intermembrane Space/Periplasmic Domain

*Scer* VPLYRAICARTGFGGIPITDRRKFTD-----DKLIPVDTEKRIRISFTSEVSQILPWKFVFPQREVVVLPGETALAFYKAKNYSDKDIIIGMATYSIAPGEAAQYFNKIQCFCFEEQK 215  
*Klac* VPLYRAICARTGFGGIPITDRRKFTD-----DKLIPVDSNKRIRISFTSEVSQILPWKFVFPQREVVVLPGETALAFYKAKNYSDKDIIIGMATYSITPGESSPYFNKIQCFCFEEQK 200  
*Calb* VPIYRAICQRTGWGGIPITDSTKFTP-----DKLIPVDNKRIRIQFTCQSSGILPWKFTPLQREVVVLPGETALAFYKAKNYSKEDIIGMATYSISPDNVAGYFNKIQCFCFEEQK 210  
*Anig* VPLYKMICQQTGWNGQPVLTHRGGDN----DTSSRVTPVTD SRRLRITFNGSVSDVLPWKFVFPQREVRVLPGETALAFYTAATNKGPDIIGVATYSVTPGVQVAPYFSKIQCFCFEEQK 174  
*Anid* VPLYKMICQQTGWNGQPVLTHRAGDG----DTSSRVTPVTD SRRLRITFNGSVSDVLPWKFVFPQREVRVLPGETALAFYTAATNKGPDIIGVATYSVTPGVQVAPYFSKIQCFCFEEQK 196  
*Bcin* VPMXKMICQTTGWGGQPIKAPGHGGSGVEGEDPSELRLPVTSAKRIRVTFNGSVSDVLPWKFVFPQREVRVLPGETALAFYTAATNKSDEDIIGVATYSVTPGVQVAPYFSKIQCFCFEEQK 208  
*Pvul* VPLYRRLCQATGYGGTVARRETVEEKI----ARHDSNNTVSTREIVVQFNADVADGMQWKFVFPQREVRVLPGETALAFYTAATNKSTPITGVSTYNVTPMKAADVFNKIQCFCFEEQK 225  
*Atha* VPLYRTFCQATGYGGTVQRKETVEEKI----ARHSESGVTTEREIVVQFNADVADGMQWKFVFPQREVRVLPGETALAFYTAATNKSSAPITGVSTYNVTPMKAAGVYFNKIQCFCFEEQK 155  
*Hsap* VPLYRRLCQATGYGGTVARRETVEEKI----ARHDSNNTVSTREIVVQFNADVADGMQWKFVFPQREVRVLPGETALAFYTAATNKSTPITGVSTYNVTPMKAADVFNKIQCFCFEEQK 225  
*Btau* VPLYRRLCQATGYGGTVARRETVEEKI----ARHDSNNTVSTREIVVQFNADVADGMQWKFVFPQREVRVLPGETALAFYTAATNKSDEDIIGVATYSVTPGVQVAPYFSKIQCFCFEEQK 219  
*Dmel* VPLYRRLCQATGYGGTVARRETVEEKI----ARHDSNNTVSTREIVVQFNADVADGMQWKFVFPQREVRVLPGETALAFYTAATNKSDEDIIGVATYSVTPGVQVAPYFSKIQCFCFEEQK 219  
*Cele* IPAYRIFCQTSFGGLTQVA-KDFDKI-----ANMKKCEDRLIRVQFNSDVPSMRWFKFQQHEIYVHPGETALAFYTAATNKSDEDIIGVATYSVTPGVQVAPYFSKIQCFCFEEQK 190  
*Rpro* VPIYRRLCQATGYGGTVARRETVEEKI----ARHDSNNTVSTREIVVQFNADVADGMQWKFVFPQREVRVLPGETALAFYTAATNKSDEDIIGVATYSVTPGVQVAPYFSKIQCFCFEEQK 135  
*Bovi* VPLYRRLCQATGYGGTVARRETVEEKI----ARHDSNNTVSTREIVVQFNADVADGMQWKFVFPQREVRVLPGETALAFYTAATNKSDEDIIGVATYSVTPGVQVAPYFSKIQCFCFEEQK 142  
*Para* VPFYSWFCRVTGFAGTTNVAEAAASDT-----VLEEKIRVRFEDANVDPNLTGTFRPMQREMELRIGENALAFYEAANNNTDEPITGTASYNVAPDAAGYFNKIDCFCFTEQK 136

*Scer* LAAGEIDMPVFFFIDPDFASDPAMRNIDDIILHYTFFR AHYGDGTAVSDSKKEPEMNADEKAASLANAAILSPVIDTRKDNSN 300  
*Klac* LAAGEEVDMPVFFFIDPDFASDPAMRNIDDIILHYTFFR AHYADGSAVSDAAAKPEVITSQ 261  
*Calb* LSAGEEVDMPVFFFIDPDFAKDPAMRNIDVVLHYSFFKAHYSDGELAAAPIGNMEMKASVVS 273  
*Anig* LNAGESVDMPVFFFIDPDFVVDKDPAMKIDITITLSYTFFKARYDDNGVLKPLPSS 228  
*Anid* LNAGESVDMPVFFFIDPDFVTDKDPAMKIDITITLSYTFFKARYDDNGVLKPIAGN 250  
*Bcin* LNAGETVDMPVFFYIDPDFVNDPNMARGIEQVTLSTYTFFKARYDKNGHLKAMPVAVLRVAGYLHMYLKSEE 279  
*Pvul* LLPGEQIDMPVFFYIDPEFETDPKMNGINNIVLSYTFFKVSE 268  
*Atha* LLPGEQIDMPVFFYIDPEFETDPRMDGINNLSYTFFKVSE 268  
*Hsap* LNPQEEVDMPVFFYIDPEFAEDPRMIKVDLITLSYTFFEAKEGHKLPVPGYN 276  
*Btau* LNPQEEVDMPVFFYIDPEFAEDPRMNVNVDLITLSYTFFEAKEGHTLPVPGYNSNQQLSPASNL 282  
*Dmel* LNPHEEVDMPVFFYIDPEITADPALETCDTITLSYTFFEAKEGLKLNFPYAKPHAASA 241  
*Cele* LNPGEQVLDLPVFFYIDPDFVNDPALEYLDSILLSYTFFEAKSGLKLPDPDPKRNPSIAPSPDKVPEATK 260  
*Rpro* LKAREKVLMPVTFYIDNDFERDPEMENIKVITLSYSFFKIREL 178  
*Bovi* LKPGEDLELPPVFFVVDPEFVNDPDLKDKVTITLSYTFFPIDKPKPVVNAKAVGSTRNGG 201  
*Para* LQPGERVEVPSFFVDADLVNDRDAGRIRDITLSYTFHRTGPPAPQQAALDHETEPTVN 195
